# Supplementary material
Source: PubMed Central journal article supplement (PMC5563382)
Supplement: NIHMS842924-supplement-supplement_1.pdf [file NIHMS842924-supplement-supplement_1.pdf]

1 **Supplemental Table 1. Selected studies linking total mortality with n-3 PUFAs (from dietary**  
 2 **records, supplementation use, randomized trials or circulating biomarkers).**

|                                               | N                         | Patient Type                                                                                   | Years Follow-up | Results                                                                                                                                                            |
|-----------------------------------------------|---------------------------|------------------------------------------------------------------------------------------------|-----------------|--------------------------------------------------------------------------------------------------------------------------------------------------------------------|
| <b>Dietary Data</b>                           |                           |                                                                                                |                 |                                                                                                                                                                    |
| Bell(1)                                       | 70,495                    | Vitamins and Lifestyle Study, USA                                                              | 5               | Reduced total (and cancer) mortality associated with higher LC n-3PUFA intake                                                                                      |
| Yamagishi(2)                                  | 57,972                    | Healthy Japanese                                                                               | 12.7            | Trend (p=0.1) for lower mortality with higher LC n-PUFA intakes (1.0 to 2.3 g/d)                                                                                   |
| Yuan(3)                                       | 18,224                    | Healthy Chinese men                                                                            | 12              | Fish intake inversely associated with mortality                                                                                                                    |
| Folsom(4)                                     | 41,836                    | Iowa Women's Study                                                                             | 14              | No associations with mortality across n-3 FA intake of 20 to 470 mg/d                                                                                              |
| Engeset(5)                                    | 480,535                   | European Prospective Investigation into Cancer and Nutrition (EPIC)                            | 11-18           | No associations between fish intake and total mortality                                                                                                            |
| Sala-Vila(6)                                  | 7202                      | PREDIMED Cohort                                                                                | 5.9             | Patients meeting intake recommendation for ALA had reduced total mortality, with greatest reduction in those meeting recommendations for ALA and EPA+DHA           |
| <b>Fish Oil Use – Non-randomized trials</b>   |                           |                                                                                                |                 |                                                                                                                                                                    |
| Poole(7)                                      | 12,178                    | Immediately Post-MI Prescribed FOS or not                                                      | 2.6             | Prescription of FOS associated with reduced total mortality                                                                                                        |
| Patel(8)                                      | 3827                      | Hyperlipidemic patients prescribed statins with or without ezetimibe                           | 3               | Only predictors of reduced mortality were higher HDL-C and reported use of fish oil supplements                                                                    |
| Macchia(9)                                    | 11,532                    | Post MI patients taking statins with or without fish oil                                       | 4               | Significant reduction in mortality in those on combination therapy                                                                                                 |
| <b>Fish Oil Use – Randomized trials</b>       |                           |                                                                                                |                 |                                                                                                                                                                    |
| Rizos(10)                                     | 63,279                    | Meta-analysis of 17 trials with fish oils                                                      | 2.65 (mean)     | No reduction in total mortality with fish oil use [HR = 0.96 (95% CI, 0.91-1.02)]                                                                                  |
| Casula(11)                                    | 15,384                    | Meta-analysis of 11 secondary prevention trials giving at least 1 g n-3 FA for at least 1 year | 2.0 (mean)      | No reduction in total mortality with fish oil use [HR = 0.89 (95% CI, 0.78-1.02)] but significant reductions in cardiac and sudden death and myocardial infarction |
| <b>Biomarker</b>                              |                           |                                                                                                |                 |                                                                                                                                                                    |
| Wu(12)<br>Plasma phospholipids (PL)           | 2792                      | Generally healthy elderly (mean age 74 at baseline)                                            | 11.5            | Higher plasma PL LA associated with lower risk for total (and CVD) mortality. Higher levels of total n-6 and n-3 associated with the lowest total mortality risk   |
| Warenjo(13)<br>Plasma cholesteryl esters (CE) | 279 cases<br>279 controls | Population-based cohort                                                                        | 12.5            | Only PUFA associated with total mortality was LA (inversely)                                                                                                       |
| Laaksonen(14)<br>Plasma                       | 1551                      | Population-based cohort of men                                                                 | 15              | Serum LA associated with lower total mortality; data for EPA/DHA not reported                                                                                      |
| Mozaffarian(15)<br>Plasma PL                  | 2692                      | Generally healthy elderly (mean age 74 at baseline)                                            | 11.5            | Higher plasma PL LC n-3 PUFA associated with lower total and CVD mortality                                                                                         |
| Lindberg(16)<br>Plasma PL                     | 254                       | Elderly admitted for acute illness                                                             | 3               | Higher plasma PL EPA (not DHA) associated with reduced mortality (Q1 v Q234)                                                                                       |
| Harris(17)<br>Red Blood Cells (RBC)           | 1114                      | Immediately Post-MI                                                                            | 2               | Higher EPA associated with lower mortality                                                                                                                         |
| Pottala(18)<br>Whole Blood                    | 956                       | History of CVD                                                                                 | 5.6             | Reduced mortality associated with higher blood EPA+DHA                                                                                                             |
| Chien(19)<br>Plasma                           | 1833                      | Healthy Taiwanese                                                                              | 9.6             | Plasma EPA inversely associated with total mortality                                                                                                               |
| Marklund(20)<br>Plasma CE                     | 4232                      | Generally healthy cohort (mean age 60)                                                         | 14.9            | EPA and DHA (and LA) inversely associated with total mortality                                                                                                     |

|                       |      |                                                              |      |                                                                                                                                 |
|-----------------------|------|--------------------------------------------------------------|------|---------------------------------------------------------------------------------------------------------------------------------|
| Eide(21)<br>Plasma PL | 1990 | Renal transplant recipients<br>in Norway                     | 6.8  | Higher marine n-3 PUFA associated with lower<br>total and CVD mortality                                                         |
| Kleber(22)<br>RBC     | 3259 | Suspected CAD                                                | 10   | Higher marine n-3 PUFA associated with lower<br>total mortality                                                                 |
| Current Study<br>RBC  | 6501 | Generally healthy post-<br>menopausal women (mean<br>age 70) | 14.9 | Higher Omega-3 Index, EPA and DHA associated<br>with reduced total mortality; EPA also associated<br>with reduced CVD mortality |

3

4

5 **Supplementaal Table 2. Participant's baseline characteristics by survival status at last contact and**  
6 **causes of death during 14.9-years median follow up (IQR (12.9-15.9))**

|                                             | Alive       | Dead        | P value <sup>1</sup> | Cause of death |             |             | P value <sup>1</sup> |
|---------------------------------------------|-------------|-------------|----------------------|----------------|-------------|-------------|----------------------|
|                                             |             |             |                      | Cancer         | CVD         | Others      |                      |
| Age at baseline [years]: mean (SD)          | 4650        | 1851        |                      | 462            | 617         | 772         |                      |
| HT randomization arms: n (%)                | 69.6 (3.6)  | 71.5 (4.0)  | <0.0001              | 70.7 (4.0)     | 72.0 (4.1)  | 71.7 (3.9)  | <0.0001              |
| E-alone intervention                        | 909 (19.6)  | 367 (19.8)  | 0.41                 | 80 (17.3)      | 133 (21.6)  | 154 (20.0)  | 0.06                 |
| E-alone control                             | 892 (19.2)  | 383 (20.7)  |                      | 93 (20.1)      | 147 (23.8)  | 143 (18.5)  |                      |
| E+P intervention                            | 1408 (30.3) | 559 (30.2)  |                      | 150 (32.5)     | 177 (28.7)  | 232 (30.1)  |                      |
| E+P control                                 | 1441 (31.0) | 542 (29.3)  |                      | 139 (30.1)     | 160 (25.9)  | 243 (31.5)  |                      |
| Race: n (%)                                 |             |             | 0.0001               |                |             |             | 0.1                  |
| Asian or Pacific Islander                   | 90 (1.9)    | 27 (2.0)    |                      | 8 (1.7)        | 11 (1.8)    | 8 (1.0)     |                      |
| Black or African American                   | 328 (7.1)   | 106 (5.7)   |                      | 32 (6.9)       | 43 (7.0)    | 31 (1.6)    |                      |
| Hispanic or Latino                          | 120 (2.6)   | 20 (1.1)    |                      | 4 (0.9)        | 4 (0.7)     | 12 (1.6)    |                      |
| Non-Hispanic White                          | 4025 (87)   | 1672 (90.3) |                      | 411 (89.0)     | 552 (89.5)  | 709 (91.8)  |                      |
| Other                                       | 87 (1.9)    | 26 (1.4)    |                      | 7 (1.5)        | 7 (1.1)     | 12 (1.6)    |                      |
| Highest Education: n (%)                    |             |             | 0.2                  |                |             |             | 0.2                  |
| High School or Less                         | 1373 (29.5) | 548 (29.6)  |                      | 137 (30.0)     | 176 (28.5)  | 235 (30.4)  |                      |
| Some College/Tech School                    | 1848 (39.7) | 780 (42.1)  |                      | 204 (44.2)     | 277 (44.9)  | 299 (38.7)  |                      |
| Bachelor's Degree                           | 832 (17.9)  | 308 (16.6)  |                      | 73 (15.8)      | 89 (14.4)   | 146 (18.9)  |                      |
| Master's Degree or Higher                   | 597 (12.8)  | 215 (11.6)  |                      | 48 (10.4)      | 75 (12.2)   | 92 (12.5)   |                      |
| Body Mass Index [kg/m <sup>2</sup> ]: n (%) |             |             | 0.9                  |                |             |             | 0.1                  |
| < 25                                        | 1356 (29.2) | 559 (30.2)  |                      | 140 (30.3)     | 171 (27.7)  | 248 (32.1)  |                      |
| [25 – 30)                                   | 1730 (37.2) | 672 (36.3)  |                      | 154 (33.3)     | 231 (37.4)  | 287 (37.2)  |                      |
| [30 – 35)                                   | 1009 (21.7) | 401 (21.7)  |                      | 112 (24.2)     | 139 (22.5)  | 150 (19.4)  |                      |
| [35 – 40)                                   | 392 (8.4)   | 159 (8.6)   |                      | 47 (10.2)      | 53 (8.6)    | 59 (7.6)    |                      |
| ≥ 40                                        | 163 (3.5)   | 60 (3.2)    |                      | 9 (2.0)        | 23 (3.7)    | 28 (3.6)    |                      |
| Waist circumference [cm]: mean (SD)         | 88.0 (13.2) | 89.4 (13.5) | 0.0002               | 89.8 (13.5)    | 90.0 (13.4) | 88.7 (13.6) | 0.2                  |
| Physical activity [METs/wk]: mean (SD)      | 11.9 (13.5) | 10.0 (12.9) | <0.0001              | 10.2 (12.0)    | 9.5 (12.0)  | 10.2 (14.0) | 0.5                  |
| Alcohol >7 drinks/wk: n (%)                 | 542 (11.7)  | 244 (13.2)  | 0.09                 | 74 (16.0)      | 69 (11.2)   | 101 (13.1)  | 0.07                 |
| Smoking pack-years: n (%)                   |             |             | <0.0001              |                |             |             | 0.006                |
| Never smoking                               | 2645 (56.9) | 868 (46.9)  |                      | 180 (39.0)     | 306 (49.6)  | 382 (49.5)  |                      |
| <10                                         | 773 (16.6)  | 273 (14.8)  |                      | 66 (14.3)      | 102 (16.5)  | 105 (13.6)  |                      |
| [10 – 20)                                   | 406 (8.7)   | 133 (7.2)   |                      | 35 (7.6)       | 44 (7.1)    | 54 (7.0)    |                      |
| [20 - 30)                                   | 288 (6.2)   | 151 (8.2)   |                      | 49 (10.6)      | 41 (6.7)    | 61 (7.9)    |                      |
| [30 – 40)                                   | 179 (3.9)   | 82 (4.4)    |                      | 24 (5.2)       | 25 (4.1)    | 33 (4.3)    |                      |
| ≥ 40                                        | 359 (7.7)   | 344 (18.6)  |                      | 108 (23.4)     | 99(16.1)    | 137 (17.8)  |                      |
| Family history of cancer: n (%)             | 3004 (64.6) | 1169 (63.2) | 0.3                  | 313 (67.8)     | 231 (62.6)  | 302 (60.9)  | 0.05                 |
| Family history of CVD: n (%)                | 3222 (69.3) | 1302 (70.3) | 0.4                  | 315 (68.2)     | 452 (73.3)  | 535 (69.3)  | 0.1                  |
| Region of USA                               |             |             | 0.2                  |                |             |             | 0.2                  |
| Northeast                                   | 1265 (27.2) | 534 (28.9)  |                      | 140 (30.3)     | 172 (27.9)  | 22 (28.8)   |                      |
| South                                       | 971 (20.9)  | 379 (20.5)  |                      | 75 (16.2)      | 135 (21.9)  | 169 (21.9)  |                      |
| Midwest                                     | 1154 (24.8) | 420 (22.7)  |                      | 107 (23.2)     | 131 (21.2)  | 182 (23.6)  |                      |
| West                                        | 1260 (27.1) | 518 (28.0)  |                      | 140 (30.3)     | 179 (29.0)  | 199 (25.8)  |                      |
| Aspirin use: n (%)                          | 1213 (26.1) | 508 (27.4)  | 0.3                  | 133 (28.8)     | 183 (29.7)  | 192 (24.9)  | 0.1                  |
| Taking pills for cholesterol: n (%)         | 811 (17.4)  | 346 (18.7)  | 0.2                  | 76 (16.5)      | 142 (23.0)  | 128 (16.6)  | 0.0034               |
| Hypertension: n (%)                         | 2142 (46.1) | 1071 (57.9) | <0.0001              | 226 (48.9)     | 410 (66.5)  | 435 (56.4)  | <0.0001              |
| Diabetes: n (%)                             | 228 (4.9)   | 192 (10.4)  | <0.0001              | 30 (6.5)       | 89 (14.4)   | 73 (9.5)    | <0.0001              |
| Cardiovascular disease: n (%)               | 677 (14.6)  | 446 (24.1)  | <0.0001              | 90 (19.5)      | 194 (31.4)  | 162 (21.0)  | <0.0001              |
| History of Cancer: n (%)                    | 147 (3.2)   | 87 (4.7)    | 0.0034               | 25 (5.4)       | 29 (4.7)    | 33 (4.3)    | 0.7                  |

8 <sup>1</sup> A Chi-squared test was used to evaluate differences for categorical variables, and a t-test or one-way

9 ANOVA was used for continuous variables.

10

11 **Supplemental Table 3. Sensitivity Analyses for Associations of RBC PUFA and Total Mortality:**  
 12 **Multivariable-adjusted hazard ratios (99% CI) per 1-SD in the fully-adjusted model<sup>a</sup>**

|                                | <i>Excluding death in first two years</i> | <i>Excluding CVD/cancer at baseline</i> | <i>Stratified by ASA use at baseline<sup>b</sup></i> |                     |
|--------------------------------|-------------------------------------------|-----------------------------------------|------------------------------------------------------|---------------------|
|                                | (n=6436)                                  | (n=5144)                                | <u>No (n=4780)</u>                                   | <u>Yes (n=1721)</u> |
| Omega-3 index (EPA+DHA)        | <b>0.91 (0.85, 0.98)</b>                  | <b>0.91 (0.84, 0.99)</b>                | <b>0.9 (0.83, 0.99)</b>                              | 0.96 (0.83, 1.1)    |
| Eicosapentaenoic (EPA)         | <b>0.89 (0.82, 0.96)</b>                  | <b>0.88 (0.8, 0.97)</b>                 | <b>0.88 (0.8, 0.95)</b>                              | 0.92 (0.79, 1.06)   |
| Docosahexaenoic (DHA)          | <b>0.93 (0.86, 1)</b>                     | 0.93 (0.85, 1.01)                       | 0.92 (0.84, 1.01)                                    | 0.97 (0.84, 1.11)   |
| Linoleic Acid (LA)             | 0.99 (0.92, 1.06)                         | 1.01 (0.93, 1.1)                        | 1 (0.92, 1.08)                                       | 0.99 (0.87, 1.12)   |
| PUFA Factor Score <sup>c</sup> | <b>0.77 (0.65, 0.91)</b>                  | <b>0.78 (0.63, 0.96)</b>                | <b>0.75 (0.61, 0.91)</b>                             | 0.85 (0.64, 1.13)   |
| Alpha linolenic (ALA)          | 0.97 (0.9, 1.05)                          | 1 (0.91, 1.09)                          | 0.97 (0.88, 1.07)                                    | 1 (0.86, 1.15)      |
| Docosapentaenoic n-3 (DPAn-3)  | 0.93 (0.86, 1.01)                         | 0.93 (0.85, 1.02)                       | 0.92 (0.84, 1)                                       | 0.96 (0.84, 1.11)   |
| Arachidonic (ARA)              | 1 (0.92, 1.09)                            | 1.01 (0.91, 1.12)                       | 0.99 (0.89, 1.1)                                     | 1.02 (0.85, 1.22)   |
| ARA/EPA ratio                  | <b>1.12 (1.03, 1.22)</b>                  | <b>1.13 (1.03, 1.25)</b>                | <b>1.13 (1.03, 1.24)</b>                             | 1.09 (0.93, 1.28)   |
| N-6/N-3 ratio                  | <b>1.1 (1.02, 1.2)</b>                    | <b>1.12 (1.02, 1.22)</b>                | <b>1.12 (1.01, 1.24)</b>                             | 1.06 (0.92, 1.22)   |

13 <sup>a</sup>Model components shown in Table 3. <sup>b</sup> Interactions all p>0.08. <sup>c</sup> See Table 2.

14

15 **Supplemental Table 4. Multivariable-adjusted hazard ratios (99% CI) per 1-SD increase in red**  
 16 **blood cell polyunsaturated fatty acids for CVD, cancer and other mortality over 14.9 (median)**  
 17 **years follow up from the fully adjusted model<sup>a</sup>.**

|                               | <i>CVD Death</i><br>(n=617) | <i>Cancer Death</i><br>(n=462) | <i>Other Death</i><br>(n=772) |
|-------------------------------|-----------------------------|--------------------------------|-------------------------------|
| Omega-3 index (EPA+DHA)       | 0.97 (0.85, 1.12)           | 0.92 (0.79, 1.07)              | 0.89 (0.78, 1.01)             |
| Eicosapentaenoic (EPA)        | <b>0.88 (0.77, 1.00)</b>    | 0.91 (0.78, 1.07)              | 0.87 (0.76, 1.01)             |
| Docosahexaenoic (DHA)         | 1 (0.87, 1.14)              | 0.93 (0.79, 1.09)              | 0.9 (0.79, 1.02)              |
| Linoleic Acid (LA)            | 0.96 (0.86, 1.08)           | 0.94 (0.83, 1.07)              | 1.05 (0.93, 1.17)             |
| PUFA Factor Score             | 0.76 (0.57, 1.01)           | 0.81 (0.57, 1.16)              | 0.76 (0.55, 1.04)             |
| Alpha linolenic (ALA)         | 0.97 (0.84, 1.12)           | 0.98 (0.85, 1.12)              | 0.98 (0.86, 1.13)             |
| Docosapentaenoic n-3 (DPAn-3) | 0.92 (0.8, 1.05)            | 0.93 (0.81, 1.07)              | 0.94 (0.82, 1.07)             |
| Arachidonic (ARA)             | 1 (0.85, 1.18)              | 1.03 (0.89, 1.18)              | 0.98 (0.84, 1.14)             |
| ARA/EPA ratio                 | 1.13 (0.99, 1.29)           | 1.1 (0.93, 1.3)                | 1.13 (0.97, 1.31)             |
| N-6/N-3 ratio                 | 1.05 (0.9, 1.23)            | 1.1 (0.93, 1.3)                | 1.13 (0.97, 1.31)             |

18

19 <sup>a</sup>Model 3 described in legend for Table 2. Values in **bold** are significant (p<0.01).

20

21 **Supplemental Figure 1.** Risk for death from any cause was significantly lower at an Omega-3  
 22 Index >8% vs <4% (HR, 0.69; 95% CI 0.52 to 0.93, p=0.017), and the trend across the 3  
 23 categories (<4%, 4-8% and >8%) was significant (p=0.019).  
 24

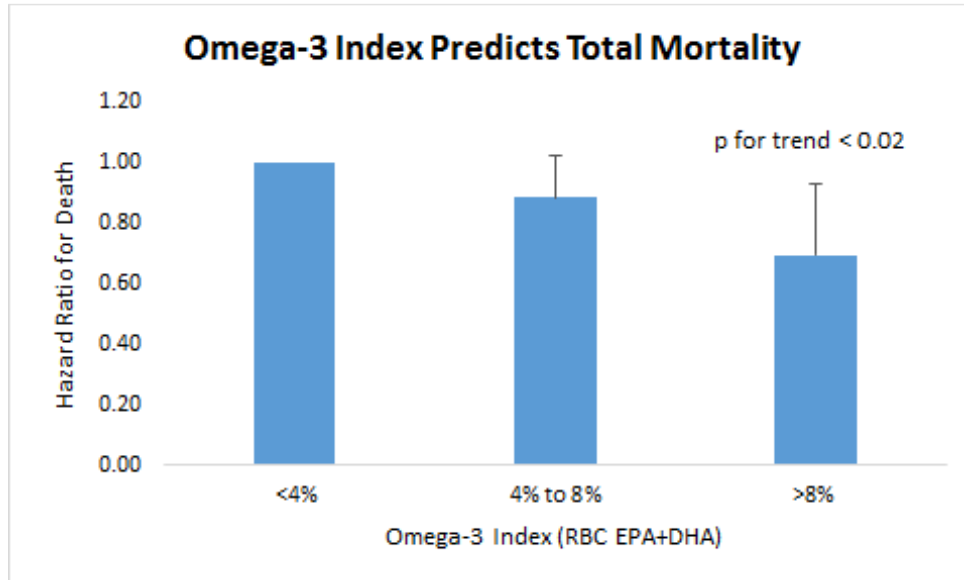

25  
 26  
 27

- 28 1. Bell GA, Kantor ED, Lampe JW, Kristal AR, Heckbert SR, White E. Intake of long-chain omega-3  
 29 fatty acids from diet and supplements in relation to mortality. *American journal of epidemiology*  
 30 2014;179(6):710-20. doi: 10.1093/aje/kwt326.
- 31 2. Yamagishi K, Iso H, Date C, Fukui M, Wakai K, Kikuchi S, Inaba Y, Tanabe N, Tamakoshi A. Fish,  
 32 omega-3 polyunsaturated fatty acids, and mortality from cardiovascular diseases in a  
 33 nationwide community-based cohort of Japanese men and women the JACC (Japan  
 34 Collaborative Cohort Study for Evaluation of Cancer Risk) Study. *J Am*  
 35 *CollCardiol*2008Sep16;52(12):988-96 2008;52:988-96.
- 36 3. Yuan JM, Ross RK, Gao YT, Yu MC. Fish and shellfish consumption in relation to death from  
 37 myocardial infarction among men in Shanghai, China. *American journal of epidemiology*  
 38 2001;154:809-16.
- 39 4. Folsom AR, Demissie Z. Fish intake, marine omega-3 fatty acids, and mortality in a cohort of  
 40 postmenopausal women. *American journal of epidemiology* 2004;160:1005-10.
- 41 5. Engeset D, Braaten T, Teucher B, Kuhn T, Bueno-de-Mesquita HB, Leenders M, Agudo A,  
 42 Bergmann MM, Valanou E, Naska A, et al. Fish consumption and mortality in the European  
 43 Prospective Investigation into Cancer and Nutrition cohort. *European journal of epidemiology*  
 44 2015;30(1):57-70. doi: 10.1007/s10654-014-9966-4.
- 45 6. Sala-Vila A, Guasch-Ferre M, Hu FB, Sanchez-Tainta A, Bullo M, Serra-Mir M, Lopez-Sabater C,  
 46 Sorli JV, Aros F, Fiol M, et al. Dietary alpha-Linolenic Acid, Marine omega-3 Fatty Acids, and  
 47 Mortality in a Population With High Fish Consumption: Findings From the PREvencion con Dleta  
 48 MEDiterranea (PREDIMED) Study. *Journal of the American Heart Association* 2016;5(1). doi:  
 49 10.1161/jaha.115.002543.

- 50 7. Poole CD, Halcox JP, Jenkins-Jones S, Carr ES, Schiffers MG, Ray KK, Currie CJ. Omega-3 Fatty  
51 acids and mortality outcome in patients with and without type 2 diabetes after myocardial  
52 infarction: a retrospective, matched-cohort study. *Clin Therap* 2013;35(1):40-51. doi:  
53 10.1016/j.clinthera.2012.11.008.
- 54 8. Patel AY, Pillarisetti J, Marr J, Vacek JL. Ezetimibe in combination with a statin does not reduce  
55 all-cause mortality. *Journal of clinical medicine research* 2013;5(4):275-80. doi:  
56 10.4021/jocmr1371w.
- 57 9. Macchia A, Romero M, D'Ettoire A, Tognoni G, Mariani J. Exploratory analysis on the use of  
58 statins with or without n-3 PUFA and major events in patients discharged for acute myocardial  
59 infarction: an observational retrospective study. *PloS one* 2013;8(5):e62772. doi:  
60 10.1371/journal.pone.0062772.
- 61 10. Rizos EC, Ntzani EE, Bika E, Kostapanos MS, Elisaf MS. Association between omega-3 fatty acid  
62 supplementation and risk of major cardiovascular disease events: a systematic review and meta-  
63 analysis. *JAMA* 2012;308:1024-33.
- 64 11. Casula M, Soranna D, Catapano AL, Corrao G. Long-term effect of high dose omega-3 fatty acid  
65 supplementation for secondary prevention of cardiovascular outcomes: A meta-analysis of  
66 randomized, double blind, placebo controlled trials. *Atheroscler Suppl* 2013;14(2):243-51. doi:  
67 10.1016/s1567-5688(13)70005-9.
- 68 12. Wu JH, Lemaitre RN, King IB, Song X, Psaty BM, Siscovick DS, Mozaffarian D. Circulating omega-6  
69 polyunsaturated fatty acids and total and cause-specific mortality: the Cardiovascular Health  
70 Study. *Circulation* 2014;130(15):1245-53. doi: 10.1161/circulationaha.114.011590.
- 71 13. Warensjo E, Sundstrom J, Vessby B, Cederholm T, Riserus U. Markers of dietary fat quality and  
72 fatty acid desaturation as predictors of total and cardiovascular mortality: a population-based  
73 prospective study. *Am J Clin Nutr* 2008Jul;88(1):203-9 2008;88:203-9.
- 74 14. Laaksonen DE, Nyyssonen K, Niskanen L, Rissanen TH, Salonen JT. Prediction of cardiovascular  
75 mortality in middle-aged men by dietary and serum linoleic and polyunsaturated fatty acids.  
76 *ArchInternMed* 2005;165:193-9.
- 77 15. Mozaffarian D, Lemaitre RN, King IB, Song X, Huang H, Sacks FM, Rimm EB, Wang M, Siscovick  
78 DS. Plasma phospholipid long-chain omega-3 fatty acids and total and cause-specific mortality in  
79 older adults: a cohort study. *Annals of internal medicine* 2013;158(7):515-25. doi:  
80 10.7326/0003-4819-158-7-201304020-00003.
- 81 16. Lindberg M, Saltvedt I, Sletvold O, Bjerve KS. Long-chain n-3 fatty acids and mortality in elderly  
82 patients. *Am J Clin Nutr* 2008;88:722-9.
- 83 17. Harris WS, Kennedy KF, O'Keefe JH, Jr., Spertus JA. Red blood cell fatty acid levels improve  
84 GRACE score prediction of 2-yr mortality in patients with myocardial infarction. *International*  
85 *journal of cardiology* 2013;168(1):53-9. doi: 10.1016/j.ijcard.2012.09.076.
- 86 18. Pottala JV, Garg S, Cohen BE, Whooley MA, Harris WS. Blood Eicosapentaenoic and  
87 Docosahexaenoic Acids Predict All-Cause Mortality in Patients With Stable Coronary Heart  
88 Disease: The Heart and Soul Study. *CircCardiovascQualOutcomes* 2010;3:406-12.
- 89 19. Chien KL, Lin HJ, Hsu HC, Chen PC, Su TC, Chen MF, Lee YT. Comparison of predictive  
90 performance of various fatty acids for the risk of cardiovascular disease events and all-cause  
91 deaths in a community-based cohort. *Atherosclerosis* 2013;230(1):140-7. doi:  
92 10.1016/j.atherosclerosis.2013.06.015.
- 93 20. Marklund M, Leander K, Vikstrom M, Laguzzi F, Gigante B, Sjogren P, Cederholm T, de Faire U,  
94 Hellenius ML, Riserus U. Polyunsaturated Fat Intake Estimated by Circulating Biomarkers and  
95 Risk of Cardiovascular Disease and All-Cause Mortality in a Population-Based Cohort of 60-Year-  
96 Old Men and Women. *Circulation* 2015;132(7):586-94. doi: 10.1161/circulationaha.115.015607.

- 97 21. Eide IA, Jenssen T, Hartmann A, Diep LM, Dahle DO, Reisaeter AV, Bjerve KS, Christensen JH,  
98 Schmidt EB, Svensson M. The association between marine n-3 polyunsaturated fatty acid levels  
99 and survival after renal transplantation. *Clin J Am Soc Nephrol* 2015;10(7):1246-56. doi:  
100 10.2215/cjn.11931214.
- 101 22. Kleber ME, Delgado GE, Lorkowski S, Marz W, von Schacky C. Omega-3 fatty acids and mortality  
102 in patients referred for coronary angiography. The Ludwigshafen Risk and Cardiovascular Health  
103 Study. *Atherosclerosis* 2016. doi: 10.1016/j.atherosclerosis.2016.06.049.
- 104
- 105
